# Supplementary material
Source: MDPI journal article supplement (https://www.mdpi.com/2072-4292/14/14/3239)
Supplement: s1 [file s1]

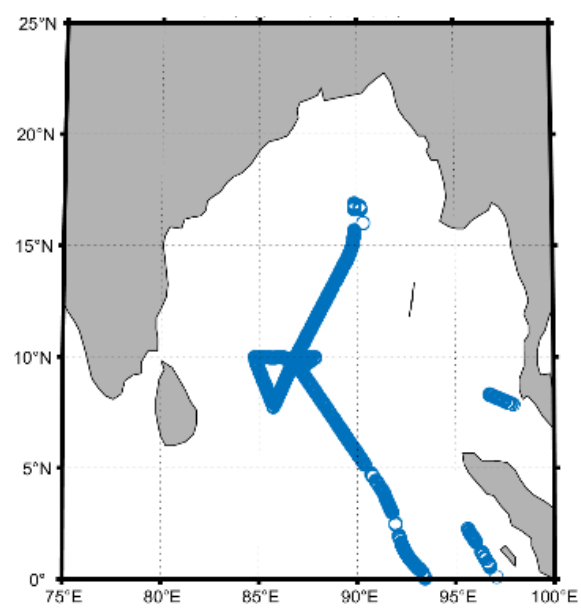

Figure S1: Seawater  $p\text{CO}_2$  observation data used for training in the Indian Ocean.

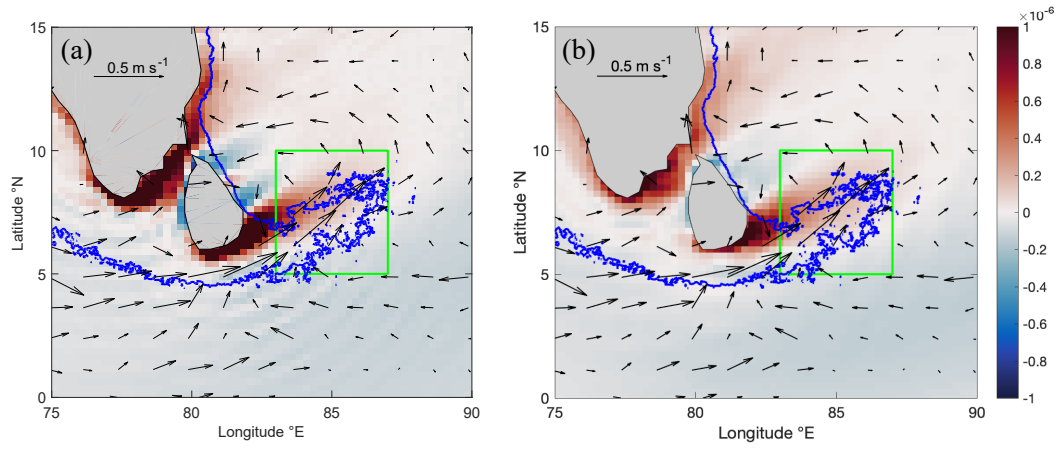

Figure S2: Winds stress curl of (a) ERA5 and (b) CCMP in the southwest of Bay of Bengal.

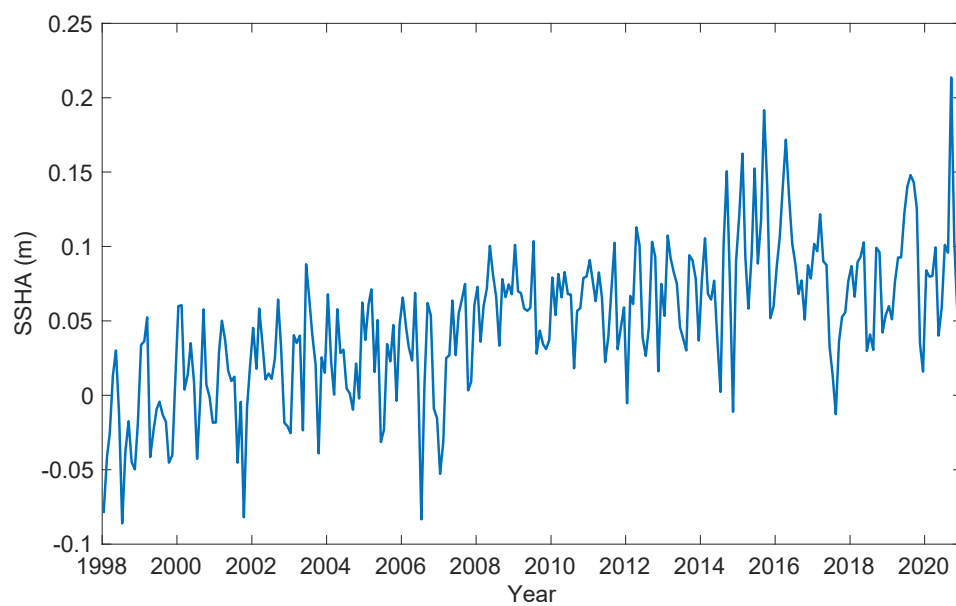

Figure S3: Timeseries of mean SSHA in the SLD region from 1998 to 2020.
